# Supplementary material for: Beta-lead oxide quantum dot (β-PbO QD)/polystyrene (PS) composite films and their applications in ultrafast photonics
Source: Royal Society of Chemistry journal article supplement (doi:10.1039/c9nr01112a), 2019-01-01
Supplement: c9nr01112a1.pdf [file c9nr01112a1.pdf]

## Beta-Lead Oxide Quantum Dots ( $\beta$ -PbO QDs)/Polystyrene (PS) Composite Film and Its Applications in Ultrafast Photonics

Yanqi Ge, Weichun Huang, Fumei Yang, Jiefeng Liu, Cong Wang, Yunzheng Wang, Jia Guo, Feng Zhang, Yufeng Song, Shixiang Xu, Dianyuan Fan, and Han Zhang

For comparison,  $\beta$ -PbO QDs after being stored in NMP for one month was added in Fig. I1. It can be clearly shown that  $\beta$ -PbO QDs have excellent stability no matter where they are kept in solvents such as NMP, or in solid states such as  $\beta$ -PbO QDs/PS composite film, indicating that its great potential in practical applications. In addition, it should be noted that the enhanced absorbance for  $\beta$ -PbO QDs/PS composite film in Fig. I1 is mainly attributed to the higher concentration of  $\beta$ -PbO QDs in its composite film than that in the NMP suspension.”

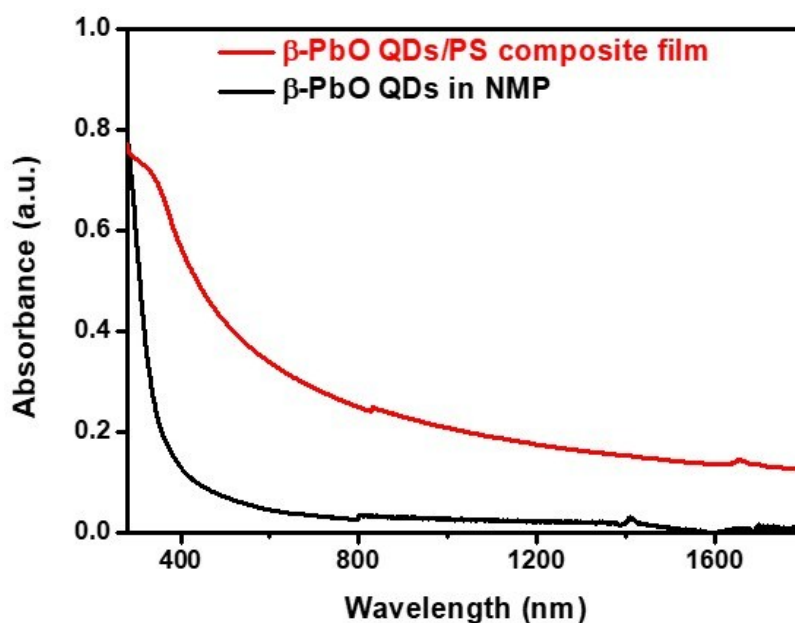

Fig. I1. UV-Vis-NIR absorption spectrum of  $\beta$ -PbO QDs/PS composite film.
